# Supplementary material
Source: publisher figshare collection journal article supplement (https://gsajournals.figshare.com/ndownloader/files/22312032)
Supplement: Supplementary file 1 [file 22312032]

## Sheet: Sheet1
S6 Table: RNAseq analysis of GSY147 supplemented with WYF, with and without Credit41 treatment
Systematic name	baseMean	log2FoldChange	lfcSE	stat	pvalue	padj	geneName
YPL127C	272.863	2.86009	0.131167	21.7067	1.77165e-104	4.58088e-102	HHO1
YMR215W	389.566	2.73704	0.122409	22.3119	2.83108e-110	8.86127e-108	GAS3
YHR061C	79.9372	2.70646	0.223266	11.9768	4.70164e-33	1.70492e-31	GIC1
YNL289W	915.132	2.64654	0.175809	15.0435	3.80808e-51	2.40922e-49	PCL1
YNL300W	3995.01	2.61479	0.107797	24.2531	6.1283e-130	2.60321e-127	TOS6
YGR153W	22.3386	2.58975	0.334154	7.3458	2.0453e-13	2.24416e-12	NA
YLR045C	405.405	2.55831	0.139619	18.2904	9.87459e-75	1.12931e-72	STU2
YOR247W	632.742	2.54427	0.129126	19.6874	2.76638e-86	4.5699e-84	SRL1
YHR172W	214.076	2.53072	0.143944	17.5143	1.1146e-68	1.06912e-66	SPC97
YJL158C	921.67	2.47105	0.117406	21.0366	3.03356e-98	7.21624e-96	CIS3
YDR451C	314.388	2.42896	0.124401	19.4838	1.50796e-84	2.29945e-82	YHP1
YBL002W	8197.62	2.42276	0.11575	20.9302	2.84358e-97	6.50413e-95	HTB2
YPR119W	338.827	2.38661	0.118251	20.1502	2.68081e-90	5.14283e-88	CLB2
YNL030W	165.301	2.38392	0.146355	16.2089	4.36173e-59	3.28344e-57	HHF2
YIL123W	634.81	2.35675	0.0833435	28.2525	1.32459e-175	1.57547e-172	SIM1
YMR305C	1261.6	2.30332	0.125601	18.3324	4.56093e-75	5.3184e-73	SCW10
YBR009C	136.686	2.30168	0.179132	12.7987	1.66637e-37	7.18107e-36	HHF1
YMR003W	75.8052	2.25267	0.208762	10.7028	9.87017e-27	2.4872e-25	AIM34
YJR092W	1013.84	2.24984	0.127249	17.6751	6.52817e-70	6.4705e-68	BUD4
YJL118W	246.795	2.23469	0.187735	11.8853	1.41081e-32	4.90648e-31	NA
YJL153C	1232.79	2.22403	0.143159	15.5278	2.2501e-54	1.48681e-52	INO1
YCL063W	276.903	2.20178	0.1362	16.1409	1.31578e-58	9.78117e-57	VAC17
YML027W	421.745	2.20141	0.22704	9.6884	3.37783e-22	6.71838e-21	YOX1
YNL283C	869.573	2.18303	0.15131	14.4235	3.68162e-47	2.0852e-45	WSC2
YIL131C	243.823	2.1591	0.227653	9.47393	2.69498e-21	5.15339e-20	FKH1
YGR108W	330.394	2.15661	0.141849	15.1858	4.39173e-52	2.80835e-50	CLB1
YJL092W	519.686	2.15017	0.0770734	27.8664	6.82519e-171	6.7649e-168	SRS2
YBL003C	275.105	2.13758	0.114051	18.7005	4.90627e-78	6.48391e-76	HTA2
YDR113C	317.576	2.12074	0.183501	11.5448	7.84552e-31	2.53572e-29	PDS1
YOL007C	425.504	2.11605	0.140721	15.0236	5.14071e-51	3.21808e-49	CSI2
YOR373W	536.771	2.07011	0.211864	9.76745	1.55312e-22	3.14163e-21	NUD1
YGL021W	348.263	2.0642	0.111671	18.4624	4.14564e-76	5.13628e-74	ALK1
YNR009W	166.128	2.06353	0.128552	16.0093	1.10019e-57	7.88292e-56	NRM1
YPL163C	2297.97	2.03781	0.078336	26.01	3.8137e-149	2.52001e-146	SVS1
YMR144W	240.647	2.03393	0.118559	17.1219	1.01897e-65	9.46846e-64	FDO1
YDL003W	434.563	2.02018	0.168368	11.9882	4.09753e-33	1.5042e-31	MCD1
YDR146C	457.383	2.00375	0.146184	13.7004	1.00908e-42	5.08561e-41	SWI5
YML085C	545.635	1.99412	0.0863108	23.0881	6.10262e-118	2.01624e-115	TUB1
YDR501W	74.626	1.98458	0.210942	9.35926	8.02986e-21	1.47388e-19	PLM2
YKR013W	1810	1.98024	0.119005	16.6367	3.77658e-62	3.03505e-60	PRY2
YPL141C	851.621	1.96805	0.110124	17.8664	2.15573e-71	2.24914e-69	FRK1
YLR183C	331.335	1.95687	0.100803	19.3844	1.04607e-83	1.55525e-81	TOS4
YMR032W	155.297	1.9341	0.16412	11.7594	6.32007e-32	2.17257e-30	HOF1
YJL187C	492.039	1.92537	0.098666	19.5003	1.09216e-84	1.70923e-82	SWE1
YPL267W	35.6147	1.91797	0.280768	6.7528	1.45019e-11	1.35177e-10	ACM1
YKL101W	1312.53	1.90394	0.0810467	23.4873	5.49816e-122	2.0436e-119	HSL1
YDR507C	759.366	1.90372	0.133857	14.2175	7.13467e-46	3.85726e-44	GIN4
YHR154W	567.886	1.89885	0.166016	11.4319	2.8966e-30	9.21181e-29	RTT107
YER070W	563.827	1.87827	0.127458	14.7259	4.39266e-49	2.61232e-47	RNR1
YOR074C	154.605	1.86784	0.178406	10.4454	1.53781e-25	3.65815e-24	CDC21
YMR006C	61.1585	1.86302	0.253155	7.32858	2.32611e-13	2.54758e-12	PLB2
YOR114W	111.796	1.86166	0.222826	8.33581	7.69679e-17	1.11641e-15	NA
YPR009W	55.2155	1.85748	0.213707	8.61954	6.72234e-18	1.04929e-16	SUT2
YBR078W	812.582	1.85429	0.110412	16.7885	2.96436e-63	2.55493e-61	ECM33
YBL031W	355.611	1.83504	0.195806	9.36887	7.33105e-21	1.35397e-19	SHE1
YDL227C	195.256	1.83378	0.130346	14.037	9.25836e-45	4.91602e-43	HO
YDL211C	92.5919	1.82626	0.305981	5.96961	2.37817e-09	1.79707e-08	NA
YMR198W	152.762	1.80611	0.183907	9.80659	1.05472e-22	2.15547e-21	CIK1
YOR237W	25.7493	1.80326	0.270244	6.58893	4.43009e-11	3.96177e-10	HES1
YLR121C	747.599	1.79827	0.108732	16.534	2.08765e-61	1.65537e-59	YPS3
YLR272C	266.925	1.78485	0.112785	15.8044	2.90316e-56	2.03119e-54	YCS4
YBL009W	139.917	1.76581	0.182741	9.64582	5.11996e-22	1.00159e-20	ALK2
YIL140W	449.268	1.76431	0.197408	8.93532	4.06e-19	6.7069e-18	AXL2
YKL127W	204.507	1.75714	0.129123	13.5884	4.69042e-42	2.34403e-40	PGM1
YBR162W-A	833.342	1.75594	0.0864435	20.3083	1.08643e-91	2.15368e-89	YSY6
YPR141C	336.038	1.75045	0.159455	10.9726	5.17346e-28	1.45813e-26	KAR3
YDL101C	64.9361	1.73522	0.198981	8.67778	4.03569e-18	6.41718e-17	DUN1
YMR076C	506.516	1.73513	0.140648	12.3288	6.33964e-35	2.56475e-33	PDS5
YBL063W	198.732	1.73145	0.192622	8.98123	2.67752e-19	4.49807e-18	KIP1
YPL124W	135.368	1.72912	0.131369	13.1273	2.29711e-39	1.04282e-37	SPC29
YPL253C	160.768	1.72706	0.15364	11.2249	3.0786e-29	9.38894e-28	VIK1
YBR038W	480.597	1.7194	0.171676	10.014	1.32288e-23	2.89233e-22	CHS2
YMR199W	286.374	1.71596	0.127026	13.4949	1.6756e-41	8.23537e-40	CLN1
YBL097W	145.103	1.70382	0.235371	7.23448	4.67326e-13	4.93639e-12	BRN1
YMR001C	387.165	1.701	0.136084	12.4948	7.96808e-36	3.26801e-34	CDC5
YIL158W	130.902	1.70094	0.147094	11.539	8.39178e-31	2.69762e-29	AIM20
YDR309C	263.68	1.69	0.160119	10.5457	5.31832e-26	1.30157e-24	GIC2
YOR073W	125.687	1.68742	0.132002	12.7472	3.2319e-37	1.37287e-35	SGO1
YEL061C	825.049	1.67817	0.0755139	22.2178	2.31153e-109	6.87334e-107	CIN8
YER032W	343.058	1.6761	0.176788	9.47675	2.62315e-21	5.03222e-20	FIR1
YJL077C	11.9583	1.66969	0.44605	3.62236	0.00029193	0.0010285	ICS3
YGR189C	5766.15	1.65675	0.0622997	26.5925	8.29183e-156	6.16394e-153	CRH1
YER003C	2502.52	1.6522	0.11432	14.4512	2.46431e-47	1.42284e-45	PMI40
YPL256C	777.334	1.63744	0.165978	9.86097	6.145e-23	1.28226e-21	CLN2
YBR138C	25.97	1.61906	0.324157	4.95922	7.07751e-07	3.87926e-06	NA
YNL072W	323.993	1.61352	0.239499	6.73659	1.62149e-11	1.50437e-10	RNH201
YBR182C	205.599	1.60528	0.146852	10.9227	8.98092e-28	2.46127e-26	SMP1
YNL031C	7358.83	1.60321	0.0983632	16.2989	1.00455e-59	7.65905e-58	HHT2
YMR058W	3432.94	1.60279	0.131337	12.2037	2.96978e-34	1.16962e-32	FET3
YOR315W	175.198	1.60176	0.191206	8.36874	5.82379e-17	8.55163e-16	SFG1
YJL173C	259.455	1.59089	0.140468	11.3151	1.10514e-29	3.44096e-28	RFA3
YKL113C	328.454	1.58389	0.121519	13.0244	8.8925e-39	3.94654e-37	RAD27
YBR162C	1142.31	1.58271	0.114972	13.7647	4.158e-43	2.13169e-41	TOS1
YPL241C	13.7826	1.5827	0.343721	4.5174	6.26038e-06	2.95246e-05	CIN2
YLL002W	101.764	1.5806	0.202818	7.78024	7.23892e-15	9.15954e-14	RTT109
YDR179C	53.5557	1.58015	0.237305	6.63035	3.34901e-11	3.0131e-10	CSN9
YDR497C	10835.3	1.57539	0.0719513	21.8945	2.93139e-106	7.92408e-104	ITR1
YHR152W	269.127	1.56794	0.143481	10.9235	8.89557e-28	2.44916e-26	SPO12
YML052W	244.958	1.56269	0.139779	11.1741	5.46045e-29	1.63182e-27	SUR7
YLR084C	539.129	1.55662	0.0763471	20.3815	2.44046e-92	5.00463e-90	RAX2
YML036W	210.355	1.55116	0.113058	13.7044	9.55166e-43	4.85502e-41	CGI121
YML058W	180.029	1.54997	0.134988	11.4682	1.90474e-30	6.09004e-29	SML1
YBR010W	1664.12	1.54538	0.155656	9.92846	3.13059e-23	6.72116e-22	HHT1
YOR025W	421.149	1.53493	0.116773	13.1406	1.9271e-39	8.81573e-38	HST3
YKL165C	309.6	1.52955	0.093416	16.3594	3.72795e-60	2.91712e-58	MCD4
YGR221C	82.0585	1.52221	0.198409	7.6527	1.96804e-14	2.38856e-13	TOS2
YNL044W	44.7811	1.51057	0.192316	7.80525	5.93823e-15	7.57826e-14	YIP3
YPL227C	310.828	1.50359	0.119617	12.5637	3.34342e-36	1.41016e-34	ALG5
YOL012C	104.758	1.49946	0.14842	10.0795	6.80456e-24	1.50434e-22	HTZ1
YOR389W	189.984	1.49638	0.235838	6.34275	2.25706e-10	1.9148e-09	NA
YJR053W	165.546	1.48459	0.13299	11.1512	7.06318e-29	2.04901e-27	BFA1
YFL037W	1153.59	1.47734	0.0756152	19.5352	5.51571e-85	8.86539e-83	TUB2
YDR356W	767.779	1.47184	0.17454	8.43372	3.34861e-17	5.02884e-16	SPC110
YLR086W	703.48	1.47067	0.134339	10.9465	6.90665e-28	1.92835e-26	SMC4
YGL061C	116.046	1.4701	0.175008	8.38897	4.90435e-17	7.27336e-16	DUO1
YGR152C	169.837	1.46604	0.177585	8.24929	1.59339e-16	2.26696e-15	RSR1
YDR480W	136.509	1.46182	0.134286	10.8713	1.58007e-27	4.21375e-26	DIG2
YDL018C	170.749	1.45977	0.130269	11.1895	4.58858e-29	1.38519e-27	ERP3
YKL069W	51.9031	1.45811	0.207994	6.98073	2.93656e-12	2.91548e-11	NA
YMR307W	1434.16	1.45678	0.059397	24.5228	8.43725e-133	3.85972e-130	GAS1
YNL087W	941.6	1.45548	0.0775659	18.762	1.54416e-78	2.08707e-76	TCB2
YBR070C	13.2601	1.45081	0.393155	3.64986	0.000262388	0.000934944	ALG14
YLR103C	152.388	1.4454	0.141622	10.1899	2.20038e-24	4.93799e-23	CDC45
YJL074C	402.934	1.43459	0.136019	10.5426	5.49843e-26	1.34013e-24	SMC3
YER095W	327.911	1.43068	0.139361	10.2599	1.06792e-24	2.45209e-23	RAD51
YJR030C	193.01	1.42916	0.137374	10.3938	2.64479e-25	6.24149e-24	RBH2
YNL166C	616.726	1.42856	0.129386	11.0402	2.44581e-28	6.95945e-27	BNI5
YDR225W	8224.48	1.42185	0.0757588	18.768	1.38104e-78	1.91001e-76	HTA1
YHR023W	1025.91	1.41723	0.0923677	15.3423	3.99027e-53	2.57936e-51	MYO1
YNL088W	774.2	1.41706	0.118257	11.9811	4.46556e-33	1.62925e-31	TOP2
YBR088C	68.1039	1.4103	0.187545	7.48513	7.14779e-14	8.15891e-13	POL30
YGR014W	1516.26	1.40804	0.0755497	18.6357	1.65057e-77	2.08849e-75	MSB2
YLR190W	445.231	1.40716	0.126703	11.1035	1.20686e-28	3.45057e-27	MMR1
YBR243C	334.937	1.40126	0.117398	11.9305	8.21237e-33	2.92449e-31	ALG7
YCL014W	1010.85	1.40109	0.0709414	19.7472	8.48542e-87	1.4842e-84	BUD3
YOR195W	449.21	1.39988	0.16084	8.70428	3.19601e-18	5.10932e-17	SLK19
YCR065W	1004.9	1.39937	0.100687	13.8966	6.64481e-44	3.46637e-42	HCM1
YLR112W	26.188	1.39643	0.282611	4.91283	8.97734e-07	4.83151e-06	NA
YCR034W	190.574	1.39627	0.102644	13.5844	4.95652e-42	2.45637e-40	ELO2
YML109W	274.499	1.39343	0.170326	8.17861	2.87146e-16	3.99919e-15	ZDS2
YKR010C	127.568	1.39131	0.126631	10.9674	5.48555e-28	1.5388e-26	TOF2
YIL026C	466.727	1.39083	0.0963775	14.4256	3.5728e-47	2.04303e-45	IRR1
YJL019W	427.31	1.38733	0.082654	16.7779	3.5399e-63	3.0074e-61	MPS3
YLR353W	463.446	1.38716	0.114516	12.1091	9.44853e-34	3.57901e-32	BUD8
YNL126W	464.188	1.38384	0.0759668	18.2094	4.34934e-74	4.88029e-72	SPC98
YHR127W	78.6209	1.37727	0.173812	7.90555	2.66745e-15	3.49412e-14	NA
YGL225W	599.398	1.37554	0.0948522	14.498	1.24688e-47	7.34176e-46	VRG4
YOR372C	1211.06	1.37436	0.0550226	24.9751	1.14135e-137	6.17055e-135	NDD1
YDR469W	254.055	1.37368	0.141437	9.70992	2.73551e-22	5.47747e-21	SDC1
YLR437C	210.913	1.37269	0.107346	12.7767	2.21344e-37	9.47002e-36	DIF1
YGR109C	17.0575	1.36129	0.395173	3.39993	0.000674021	0.00221826	CLB6
YLR234W	74.236	1.35514	0.32477	4.17499	2.98003e-05	0.000125334	TOP3
YDR224C	887.445	1.34534	0.100194	13.4264	4.23523e-41	2.04772e-39	HTB1
YPL255W	193.985	1.34046	0.184103	7.28246	3.27798e-13	3.53796e-12	BBP1
YOL069W	231.2	1.34041	0.102822	13.0273	8.56276e-39	3.82878e-37	NUF2
YOR382W	15.9732	1.33875	0.370843	3.55788	0.000373867	0.00128967	FIT2
YLR313C	71.8287	1.33497	0.266691	5.00579	5.56327e-07	3.09203e-06	SPH1
YLR383W	227.446	1.33385	0.159163	8.37756	5.40361e-17	7.95428e-16	SMC6
YKL042W	142.222	1.32738	0.154186	8.6024	7.80648e-18	1.21532e-16	SPC42
YNL058C	250.896	1.32403	0.142328	9.30235	1.37374e-20	2.47564e-19	NA
YMR078C	217.512	1.32185	0.151481	8.72067	2.7656e-18	4.44514e-17	CTF18
YOL114C	33.3072	1.31964	0.268099	4.90561	9.31355e-07	5.0034e-06	PTH4
YGR230W	48.2208	1.3152	0.207537	6.31714	2.66445e-10	2.24577e-09	BNS1
YBL035C	170.958	1.31453	0.199882	6.57037	5.01897e-11	4.47494e-10	POL12
YKR037C	102.813	1.3038	0.14689	8.86349	7.75502e-19	1.2705e-17	SPC34
YPL278C	123.529	1.30291	0.16062	8.10269	5.37591e-16	7.29921e-15	NA
YAL024C	481.631	1.30142	0.0780717	16.6645	2.37566e-62	1.93535e-60	LTE1
YOL113W	291.457	1.29669	0.103351	12.5445	4.25926e-36	1.78379e-34	SKM1
YGR099W	318.006	1.2938	0.126074	10.2584	1.08541e-24	2.48267e-23	TEL2
YPL209C	93.4611	1.28939	0.210603	6.11461	9.67909e-10	7.63415e-09	IPL1
YDR201W	113.693	1.28897	0.222684	5.7847	7.2644e-09	5.23653e-08	SPC19
YLR154C	116.252	1.287	0.131497	9.77154	1.49165e-22	3.02759e-21	RNH203
YEL040W	382.099	1.28555	0.118314	10.8653	1.68636e-27	4.47713e-26	UTR2
YMR117C	156.439	1.27159	0.128446	9.88929	4.633e-23	9.77037e-22	SPC24
YBR071W	1742.89	1.2689	0.0699608	18.1361	1.65506e-73	1.82271e-71	NA
YBR233W-A	103.897	1.26516	0.174892	7.22869	4.87685e-13	5.13321e-12	DAD3
YOL005C	1006.76	1.2603	0.0687143	18.3385	4.07719e-75	4.84941e-73	RPB11
YOR085W	1008.84	1.25058	0.0748745	16.6994	1.32327e-62	1.10838e-60	OST3
YGL093W	274.184	1.2479	0.107071	11.6497	2.30254e-31	7.73626e-30	SPC105
YBR160W	218.65	1.24778	0.111818	11.1527	6.9446e-29	2.02449e-27	CDC28
YLR210W	224.457	1.23906	0.115653	10.7094	9.19202e-27	2.32617e-25	CLB4
YDL157C	42.9765	1.23693	0.2084	5.90951	3.43127e-09	2.54754e-08	NA
YKR090W	263.243	1.23637	0.166592	7.42062	1.16574e-13	1.29825e-12	PXL1
YDR325W	398.762	1.23197	0.106517	11.5627	6.36591e-31	2.08011e-29	YCG1
YOL146W	133.44	1.23139	0.161186	7.63095	2.33035e-14	2.79407e-13	PSF3
YNL012W	20.7303	1.2257	0.312951	3.89449	9.84047e-05	0.000379516	SPO1
YEL065W	260.612	1.22121	0.16227	7.51829	5.54968e-14	6.38375e-13	SIT1
YER026C	1109.88	1.21648	0.123987	9.80887	1.03114e-22	2.11454e-21	CHO1
YMR179W	297.704	1.21341	0.178455	6.79991	1.04685e-11	9.89767e-11	SPT21
YNL169C	1600.19	1.21295	0.0682927	17.759	1.46736e-70	1.47905e-68	PSD1
YLR376C	29.8213	1.21002	0.242273	4.97089	6.66462e-07	3.66986e-06	PSY3
YOR326W	2175.12	1.20759	0.0548698	22.0073	2.45003e-107	6.93826e-105	MYO2
YPR182W	30.386	1.20607	0.237241	5.05866	4.22214e-07	2.38001e-06	SMX3
YCR086W	26.7008	1.20387	0.360953	3.34971	0.000808969	0.00261464	CSM1
YML060W	91.3161	1.19446	0.163787	7.27913	3.35984e-13	3.60667e-12	OGG1
YFL017C	53.0466	1.19353	0.218737	5.4415	5.28341e-08	3.37491e-07	GNA1
YLR200W	310.38	1.19324	0.17623	6.77155	1.27411e-11	1.19325e-10	YKE2
YBR264C	43.5693	1.19286	0.204758	5.80977	6.2557e-09	4.53691e-08	YPT10
YKL049C	93.8921	1.19284	0.144639	8.23612	1.77884e-16	2.51875e-15	CSE4
YPL277C	157.639	1.18646	0.162968	7.27838	3.37847e-13	3.62014e-12	NA
YDR252W	23.0978	1.18515	0.256319	4.58866	4.46105e-06	2.1569e-05	BTT1
YBR056W-A	14.7231	1.17939	0.349481	3.34528	0.000821995	0.00265098	NA
YGR188C	265.425	1.17618	0.166208	7.07628	1.48077e-12	1.50532e-11	BUB1
YLR042C	14.9743	1.17557	0.3327	3.52301	0.00042667	0.00145661	NA
YAR018C	85.1702	1.16382	0.210466	5.52812	3.23678e-08	2.13879e-07	KIN3
YDL105W	86.7384	1.16354	0.140956	8.23766	1.75618e-16	2.4926e-15	NSE4
YLL021W	1208.82	1.16157	0.120046	9.67634	3.80082e-22	7.50947e-21	SPA2
YNL102W	521.723	1.15338	0.139522	8.26389	1.41003e-16	2.01574e-15	POL1
YER018C	104.367	1.14116	0.169565	6.72555	1.74927e-11	1.61285e-10	SPC25
YMR048W	63.1716	1.13542	0.184719	6.13492	8.52032e-10	6.79227e-09	CSM3
YAL007C	396.648	1.13524	0.0948586	11.9633	5.53214e-33	1.99392e-31	ERP2
YDR097C	671.522	1.13493	0.0973686	11.6539	2.19291e-31	7.40979e-30	MSH6
YAL034W-A	53.4982	1.1324	0.262558	4.31721	1.58013e-05	6.92997e-05	MTW1
YOR084W	100.823	1.12973	0.201885	5.59304	2.23131e-08	1.50449e-07	LPX1
YPL153C	126.707	1.12666	0.261774	4.3029	1.6858e-05	7.36081e-05	RAD53
YGR098C	925.775	1.12556	0.0591165	19.0362	8.54337e-81	1.2097e-78	ESP1
YKL089W	152.697	1.12219	0.189165	5.93602	2.92021e-09	2.17898e-08	MIF2
YPR175W	166.673	1.12043	0.205697	5.44367	5.21948e-08	3.34125e-07	DPB2
YBL032W	1801.7	1.11781	0.0657863	16.9904	9.66728e-65	8.71081e-63	HEK2
YIL004C	219.064	1.11679	0.146861	7.60161	2.92478e-14	3.47179e-13	BET1
YJR054W	142.248	1.11296	0.1393	7.9838	1.41894e-15	1.88779e-14	KCH1
YGL012W	489.345	1.10771	0.0916973	12.0776	1.38786e-33	5.22382e-32	ERG4
YPL116W	466.132	1.10477	0.10589	10.4312	1.78541e-25	4.23022e-24	HOS3
YBL085W	985.831	1.09885	0.0824723	13.3233	1.69488e-40	8.06358e-39	BOI1
YDR144C	85.6465	1.09859	0.178641	6.14298	8.09881e-10	6.4736e-09	MKC7
YDR261C	542.151	1.08509	0.0993974	10.917	9.55716e-28	2.60718e-26	EXG2
YEL017W	67.6742	1.08452	0.183797	5.89126	3.83255e-09	2.83838e-08	GTT3
YOL019W	754.085	1.08288	0.086699	12.4884	8.63788e-36	3.51846e-34	NA
YER087C-B	894.166	1.08202	0.100244	10.7927	3.72728e-27	9.722e-26	SBH1
YOL017W	75.4465	1.08007	0.180316	5.98155	2.21019e-09	1.68297e-08	ESC8
YLR314C	452	1.07773	0.11151	9.6659	4.20898e-22	8.28834e-21	CDC3
YOL107W	384.038	1.07381	0.0894936	11.9929	3.87216e-33	1.43923e-31	NA
YCL026C-B	18.3074	1.07332	0.286169	3.73334	0.000188956	0.000693656	HBN1
YML101C	358.409	1.07261	0.127884	8.38594	5.03207e-17	7.4442e-16	CUE4
YAR002C-A	1330.32	1.07245	0.114088	9.39965	5.47428e-21	1.02055e-19	ERP1
YPL242C	412.559	1.07237	0.0994305	10.7851	4.04667e-27	1.0509e-25	IQG1
YHR149C	326.89	1.07138	0.10708	10.0018	1.49647e-23	3.2599e-22	SKG6
YNL290W	455.799	1.0685	0.0743224	14.3748	7.4458e-47	4.17738e-45	RFC3
YNL225C	189.424	1.06168	0.112848	9.4044	5.23282e-21	9.78604e-20	CNM67
YKR004C	206.186	1.06003	0.106168	9.97664	1.92881e-23	4.18637e-22	ECM9
YLR099W-A	188.26	1.05969	0.116431	9.09717	9.272e-20	1.5845e-18	MIM2
YLR209C	236.51	1.05849	0.100048	10.5758	3.85718e-26	9.55777e-25	PNP1
YLR381W	132.971	1.05679	0.126462	8.3506	6.79165e-17	9.92381e-16	CTF3
YLR233C	50.9904	1.05537	0.266449	3.95753	7.57293e-05	0.000297465	EST1
YJL091C	45.1916	1.05474	0.233147	4.50671	6.58416e-06	3.09779e-05	GWT1
YDR488C	104.381	1.05443	0.201703	5.22743	1.71881e-07	1.01507e-06	PAC11
YFL008W	524.294	1.05443	0.134013	7.86789	3.60684e-15	4.69363e-14	SMC1
YLR212C	86.5348	1.05406	0.203429	5.17711	2.25347e-07	1.31257e-06	TUB4
YLR126C	25.7661	1.04947	0.239149	4.36926	1.2467e-05	5.57036e-05	NA
YGR279C	846.834	1.04332	0.089605	11.6418	2.52746e-31	8.39711e-30	SCW4
YNL082W	183.573	1.04203	0.118628	8.77926	1.64552e-18	2.68107e-17	PMS1
YBR112C	1719.59	1.03729	0.0748087	13.8662	1.01467e-43	5.24717e-42	CYC8
YKL045W	122.025	1.03409	0.125095	8.25609	1.50516e-16	2.14657e-15	PRI2
YNL130C	1011.61	1.02629	0.0919084	11.1649	6.05697e-29	1.79208e-27	CPT1
YER170W	91.1398	1.02605	0.227364	4.51398	6.36234e-06	2.99817e-05	ADK2
YDL010W	152.833	1.02482	0.140715	7.28011	3.33547e-13	3.59083e-12	GRX6
YNL262W	567.097	1.01879	0.0829371	12.2806	1.15183e-34	4.62835e-33	POL2
YKR083C	100.804	1.01585	0.16749	6.06837	1.29217e-09	1.00763e-08	DAD2
YDL135C	63.9916	1.01444	0.178975	5.65227	1.58346e-08	1.0874e-07	RDI1
YDR540C	23.7119	1.01414	0.297159	3.42532	0.000614078	0.00204018	IRC4
YBR184W	31.6951	1.01149	0.304078	3.33235	0.000861168	0.00276532	NA
YHL016C	911.703	1.01122	0.142343	7.10286	1.22201e-12	1.24654e-11	DUR3
YPL144W	31.0508	1.01069	0.249686	4.04018	5.34098e-05	0.000214759	POC4
YCR043C	461.759	1.00828	0.136308	7.39664	1.3967e-13	1.54677e-12	NA
YHR062C	47.2494	1.00669	0.200152	5.0195	5.18066e-07	2.89018e-06	RPP1
YDR502C	2794.27	1.00419	0.101941	9.84967	6.8767e-23	1.42992e-21	SAM2
YJR076C	1131.61	1.0025	0.082349	12.1733	4.31249e-34	1.65461e-32	CDC11
YOR321W	187.468	1.00131	0.137568	7.27338	3.50592e-13	3.74322e-12	PMT3
YDR070C	3318.95	-1.00134	0.117581	-8.5153	1.66165e-17	2.54031e-16	FMP16
YNL203C	54.8841	-1.00178	0.169094	-5.91882	3.24256e-09	2.41345e-08	NA
YDR223W	86.8049	-1.00227	0.242416	-4.13158	3.60285e-05	0.000149311	CRF1
YMR251W-A	5357.6	-1.00681	0.176873	-5.692	1.25561e-08	8.73346e-08	HOR7
YGR088W	1163.98	-1.0106	0.190142	-5.31173	1.08591e-07	6.55626e-07	CTT1
YML054C	125.337	-1.01327	0.157686	-6.42145	1.34987e-10	1.16343e-09	CYB2
YCR100C	78.1657	-1.01607	0.233846	-4.34717	1.37908e-05	6.12045e-05	NA
YDL183C	49.288	-1.01762	0.200929	-5.05911	4.21225e-07	2.37668e-06	NA
YFL014W	20042.4	-1.02249	0.109112	-9.37083	7.19612e-21	1.33319e-19	HSP12
YCR005C	1335.69	-1.02462	0.135966	-7.53641	4.83093e-14	5.6003e-13	CIT2
YMR169C	7078.83	-1.02518	0.134136	-7.64159	2.14548e-14	2.58282e-13	ALD3
YBR117C	973.965	-1.02951	0.147249	-6.98948	2.75902e-12	2.74379e-11	TKL2
YCR012W	5231.31	-1.03691	0.108322	-9.57229	1.04567e-21	2.03223e-20	PGK1
YGL156W	473.352	-1.04597	0.107389	-9.73796	2.07686e-22	4.1868e-21	AMS1
YGR097W	1454.26	-1.04821	0.0671558	-15.6082	6.3992e-55	4.32455e-53	ASK10
YNL115C	827.172	-1.05288	0.109039	-9.65508	4.67776e-22	9.18107e-21	NA
YLR312C	213.66	-1.05385	0.111288	-9.46637	2.89728e-21	5.52248e-20	ATG39
YOL122C	413.1	-1.05849	0.0931068	-11.3665	6.14252e-30	1.93278e-28	SMF1
YJR149W	138.903	-1.06387	0.125196	-8.49357	2.00385e-17	3.04781e-16	NA
YML128C	2141.1	-1.06506	0.127716	-8.33824	7.5407e-17	1.09913e-15	MSC1
YOL132W	59.5803	-1.06627	0.262436	-4.06488	4.80576e-05	0.000194819	GAS4
YOR134W	326.245	-1.07401	0.162516	-6.60636	3.93893e-11	3.53316e-10	BAG7
YJL133C-A	410.506	-1.07441	0.201327	-5.33825	9.38469e-08	5.70079e-07	NA
YPL230W	615.696	-1.07766	0.108571	-9.92422	3.26659e-23	6.96287e-22	USV1
YKR103W	274.236	-1.08291	0.0924667	-11.7088	1.14854e-31	3.92551e-30	NFT1
YEL033W	38.4008	-1.08533	0.234789	-4.61373	3.95504e-06	1.93585e-05	MTC7
YGR043C	1762.8	-1.08569	0.0915482	-11.8582	1.95202e-32	6.74922e-31	NQM1
YER052C	731.681	-1.09088	0.105497	-10.3409	4.60253e-25	1.07761e-23	HOM3
YBR045C	75.4181	-1.09421	0.187479	-5.83244	5.46229e-09	3.99069e-08	GIP1
YBR012W-B	2085.28	-1.09562	0.0876275	-12.503	7.18995e-36	2.96935e-34	NA
YIL165C	48.5101	-1.09626	0.266872	-4.1129	3.90712e-05	0.000161083	NA
YHR007C-A	321.4	-1.09709	0.122585	-8.947	3.65259e-19	6.05068e-18	NA
YOR120W	274.981	-1.10406	0.141842	-7.7804	7.22949e-15	9.15954e-14	GCY1
YJL213W	157.444	-1.10957	0.184864	-6.00671	1.89327e-09	1.45281e-08	NA
YER150W	1050.1	-1.11024	0.13576	-8.17647	2.92272e-16	4.05161e-15	SPI1
YKR104W	88.3881	-1.13124	0.142109	-7.95404	1.8053e-15	2.38581e-14	NA
YER060W-A	32.5797	-1.13446	0.341326	-3.3332	0.000858528	0.00275982	FCY22
YBL049W	24.5504	-1.1397	0.29727	-3.81601	0.000135625	0.000511128	MOH1
YKL026C	44.8438	-1.14457	0.169554	-6.73399	1.6507e-11	1.52908e-10	GPX1
YBR069C	163.41	-1.1461	0.1122	-10.2034	1.91468e-24	4.34602e-23	TAT1
YPR157W	1098.48	-1.14894	0.142118	-8.08484	6.2247e-16	8.43241e-15	TDA6
YCL018W	1047.77	-1.15097	0.0679012	-16.9497	1.93478e-64	1.71734e-62	LEU2
YNR034W	115.314	-1.16539	0.141548	-8.22757	1.91054e-16	2.68605e-15	SOL1
YBR249C	2359.87	-1.16567	0.156949	-7.42772	1.10482e-13	1.23272e-12	ARO4
YLR174W	136.35	-1.16623	0.118173	-9.86258	6.04775e-23	1.26641e-21	IDP2
YNR065C	1161.72	-1.16655	0.0739425	-15.7761	4.54552e-56	3.14328e-54	NA
YMR084W	19.9712	-1.16779	0.322045	-3.61676	0.000298318	0.0010479	NA
YCR061W	283.468	-1.16904	0.181149	-6.45164	1.10644e-10	9.60586e-10	NA
YKL151C	927.973	-1.1692	0.110698	-10.5609	4.52163e-26	1.11116e-24	NNR2
YER160C	3107.45	-1.17292	0.168944	-6.94142	3.88171e-12	3.82828e-11	NA
YOR192C	23.2851	-1.17388	0.294049	-3.98236	6.82346e-05	0.000269092	THI72
YCR010C	21.8467	-1.17545	0.345286	-3.40194	0.000669102	0.00220329	ADY2
YOL052C-A	2029.7	-1.17603	0.139859	-8.40727	4.19673e-17	6.27084e-16	DDR2
YGR248W	172.612	-1.18274	0.227472	-5.19265	2.07317e-07	1.21469e-06	SOL4
YMR104C	324.332	-1.19441	0.156185	-7.64634	2.06782e-14	2.49438e-13	YPK2
YDR344C	202.161	-1.19459	0.192509	-6.20285	5.54484e-10	4.53616e-09	NA
YFL030W	111.417	-1.19793	0.128073	-9.3432	9.34672e-21	1.71031e-19	AGX1
YPR127W	682.936	-1.20395	0.0988716	-12.1746	4.24321e-34	1.63859e-32	NA
YMR081C	177.761	-1.208	0.355579	-3.36653	0.000761196	0.00248046	ISF1
YJL052W	2509.08	-1.21082	0.12321	-9.82642	8.66455e-23	1.78298e-21	TDH1
YHR033W	876.226	-1.21339	0.0602819	-20.1259	4.38154e-90	8.14283e-88	NA
YHR176W	84.005	-1.22038	0.228261	-5.33833	9.38088e-08	5.70079e-07	FMO1
YNR069C	274.404	-1.22056	0.157883	-7.73495	1.03446e-14	1.28702e-13	BSC5
YDL182W	8859.74	-1.22719	0.0941465	-13.0349	7.7483e-39	3.49085e-37	LYS20
YNR066C	132.586	-1.22976	0.16156	-7.60876	2.76742e-14	3.29816e-13	NA
YNL160W	6940.96	-1.23524	0.1286	-9.60465	7.64143e-22	1.48995e-20	YGP1
YML042W	208.639	-1.24538	0.125892	-9.88724	4.72893e-23	9.93743e-22	CAT2
YHR032W-A	48.6968	-1.25588	0.194368	-6.44931	1.12361e-10	9.74065e-10	NA
YFR053C	1958.96	-1.25643	0.195925	-6.40964	1.45863e-10	1.25173e-09	HXK1
YHR092C	194.439	-1.26598	0.278464	-4.54168	5.58068e-06	2.65294e-05	HXT4
YAR029W	26.096	-1.26694	0.290328	-4.34359	1.40174e-05	6.20713e-05	NA
YPR061C	148.072	-1.26982	0.164717	-7.70569	1.30142e-14	1.60571e-13	JID1
YHR214C-B	9244.06	-1.28163	0.073112	-17.5297	8.49777e-69	8.28463e-67	NA
YDR119W-A	38.7363	-1.2887	0.2341	-5.48265	4.19001e-08	2.71734e-07	COX26
YDR523C	28.8867	-1.29838	0.30319	-4.27586	1.90399e-05	8.265e-05	SPS1
YML087C	40.8559	-1.30833	0.19624	-6.64696	2.99209e-11	2.70425e-10	AIM33
YKR102W	84.1342	-1.31569	0.267616	-4.91355	8.94415e-07	4.81801e-06	FLO10
YNR068C	465.02	-1.3268	0.140789	-9.42521	4.29256e-21	8.10408e-20	NA
YBR147W	1896.51	-1.32939	0.119272	-11.1462	7.47181e-29	2.15703e-27	RTC2
YKR012C	17.0974	-1.33615	0.312638	-4.24313	2.20426e-05	9.47163e-05	NA
YGR256W	962.4	-1.33961	0.123485	-10.8455	2.09432e-27	5.51103e-26	GND2
YHR046C	182.135	-1.34386	0.128449	-10.4562	1.3724e-25	3.27777e-24	INM1
YGL184C	455.484	-1.35051	0.150896	-8.95095	3.52436e-19	5.85457e-18	STR3
YJL116C	497.393	-1.35117	0.105037	-12.8589	7.66287e-38	3.35082e-36	NCA3
YGR236C	28.026	-1.35917	0.270085	-5.00952	5.45671e-07	3.03565e-06	SPG1
YIL024C	314.989	-1.36015	0.127456	-10.6684	1.43009e-26	3.57341e-25	NA
YCL048W-A	33.6202	-1.36142	0.234438	-5.7785	7.53688e-09	5.40673e-08	NA
YDL218W	148.801	-1.36442	0.381991	-3.55597	0.000376582	0.00129678	NA
YNL194C	78.8152	-1.36467	0.180577	-7.54291	4.5961e-14	5.35941e-13	NA
YLR410W-B	881.89	-1.36647	0.183193	-7.45912	8.71008e-14	9.82901e-13	NA
YBR072W	11365.4	-1.36671	0.152283	-8.9737	2.86708e-19	4.80296e-18	HSP26
YNL144C	221.293	-1.39648	0.195535	-7.13765	9.4943e-13	9.71818e-12	NA
YBR145W	1012.88	-1.40009	0.129014	-10.8541	1.90779e-27	5.04249e-26	ADH5
YPL130W	35.4022	-1.40514	0.275571	-5.07103	3.95662e-07	2.24309e-06	SPO19
YDR256C	34.86	-1.4179	0.262213	-5.37524	7.64796e-08	4.73282e-07	CTA1
YER067W	235.41	-1.41995	0.230085	-6.16987	6.83449e-10	5.5299e-09	RGI1
YBL075C	704.228	-1.42358	0.0884124	-16.0984	2.61741e-58	1.92169e-56	SSA3
YPL058C	1579.82	-1.43124	0.0767603	-18.6445	1.39929e-77	1.80903e-75	PDR12
YIL059C	17.8992	-1.4363	0.308294	-4.62691	3.71165e-06	1.82725e-05	NA
YGL051W	48.6862	-1.44913	0.252478	-5.72559	1.03076e-08	7.2202e-08	MST27
YPL201C	86.4582	-1.45767	0.182132	-7.98934	1.35662e-15	1.80893e-14	YIG1
YOR242C	53.9485	-1.45958	0.202969	-7.16987	7.50682e-13	7.80473e-12	SSP2
YNL333W	112.319	-1.47524	0.208631	-7.06076	1.65592e-12	1.67764e-11	SNZ2
YGR146C	195.843	-1.52797	0.0885923	-17.2322	1.52276e-66	1.43743e-64	ECL1
YBR240C	169.762	-1.54078	0.0984458	-15.6333	4.31682e-55	2.95082e-53	THI2
YLR214W	74.3108	-1.55592	0.179532	-8.64929	5.18186e-18	8.17414e-17	FRE1
YGR254W	7658.78	-1.55835	0.129145	-12.066	1.59799e-33	5.97688e-32	ENO1
YOR102W	5.7606	-1.56448	0.445026	-3.39051	0.000697618	0.00229338	NA
YJR009C	1946.77	-1.5702	0.12873	-12.1969	3.23051e-34	1.26394e-32	TDH2
YJL045W	154.055	-1.57269	0.413103	-3.75508	0.000173287	0.000641678	NA
YOR339C	12.7453	-1.59144	0.370887	-4.22358	2.40456e-05	0.000102582	UBC11
YKR005C	63.2675	-1.61586	0.17868	-9.01225	2.01872e-19	3.41061e-18	NA
YBL109W	102.743	-1.6194	0.504329	-3.47188	0.000516833	0.00173961	NA
YDR055W	4610.07	-1.62635	0.115827	-14.0405	8.81464e-45	4.72258e-43	PST1
YLR466C-B	45.1691	-1.62965	0.438663	-3.80234	0.000143337	0.000537129	NA
YEL039C	108.28	-1.65708	0.24436	-6.76836	1.3025e-11	1.21792e-10	CYC7
YPL250C	8786.53	-1.65753	0.0840256	-19.7279	1.24126e-86	2.10908e-84	ATG41
YLR044C	39414.1	-1.66471	0.104525	-15.926	4.17962e-57	2.95907e-55	PDC1
YLL066W-B	596.944	-1.68182	0.278164	-6.06362	1.33092e-09	1.03329e-08	NA
YBL043W	535.49	-1.69092	0.0798433	-21.1712	1.76137e-99	4.36453e-97	ECM13
YFL059W	144.867	-1.69214	0.190677	-8.86252	7.82279e-19	1.27808e-17	SNZ3
YDR544C	1033.36	-1.71896	0.315814	-5.47293	4.42655e-08	2.85827e-07	NA
YBR012C	11.8253	-1.73238	0.421053	-4.02203	5.76994e-05	0.000229832	NA
YOL024W	17.8217	-1.74281	0.309967	-5.5371	3.07515e-08	2.04792e-07	NA
YBR047W	189.022	-1.74467	0.190219	-9.14296	6.07634e-20	1.05046e-18	FMP23
YPL036W	1449.03	-1.75818	0.0732632	-23.9945	3.17387e-127	1.25833e-124	PMA2
YMR175W	1168.19	-1.76401	0.165031	-10.683	1.22304e-26	3.06895e-25	SIP18
YHR217C	3280.43	-1.77904	0.285837	-6.24474	4.24515e-10	3.50637e-09	NA
YGL117W	342.789	-1.79036	0.187817	-9.51975	1.7359e-21	3.35176e-20	NA
YNL195C	96.4444	-1.80034	0.193861	-9.26315	1.98489e-20	3.52363e-19	NA
YNL338W	1255.51	-1.8469	0.276924	-6.68795	2.26311e-11	2.06106e-10	NA
YPR124W	213.217	-1.8544	0.13958	-13.2728	3.32892e-40	1.54665e-38	CTR1
YFL040W	13.9177	-1.91897	0.446898	-4.14976	3.32826e-05	0.000138705	NA
YLR329W	153.125	-1.9234	0.158306	-12.1206	8.21202e-34	3.13057e-32	REC102
YHR139C	361.093	-1.94696	0.1166	-16.6836	1.72443e-62	1.42433e-60	SPS100
YLR154W-F	39.0532	-1.95833	0.508611	-3.98187	6.83749e-05	0.000269467	NA
YBR054W	6048.17	-1.98338	0.147482	-13.4471	3.20295e-41	1.56131e-39	YRO2
YBL048W	14.7184	-2.00068	0.305944	-6.41059	1.44954e-10	1.24573e-09	RRT1
YHR175W	374.946	-2.03069	0.120231	-16.8715	7.29491e-64	6.37983e-62	CTR2
YLR154W-C	1602.27	-2.04223	0.473127	-4.34196	1.4122e-05	6.24877e-05	TAR1
YER096W	256.656	-2.08406	0.116045	-17.9359	6.18131e-72	6.68368e-70	SHC1
YIR039C	112.252	-2.11235	0.188646	-11.1621	6.24898e-29	1.83974e-27	YPS6
YOL091W	187.146	-2.12273	0.160343	-13.1728	1.25889e-39	5.8036e-38	SPO21
YBR294W	1021.81	-2.15998	0.121129	-17.8288	4.22389e-71	4.33094e-69	SUL1
YMR118C	33.3698	-2.16511	0.245138	-8.73797	2.37346e-18	3.8252e-17	SHH3
YKL163W	378.221	-2.17577	0.108515	-20.0325	2.86665e-89	5.16605e-87	PIR3
YPL223C	1246.23	-2.19655	0.114483	-19.1797	5.47379e-82	7.93967e-80	GRE1
YDL223C	10400.3	-2.2004	0.0948977	-23.1858	6.33788e-119	2.21714e-116	HBT1
YLR154W-B	513.505	-2.20682	0.52024	-4.32878	1.49937e-05	6.59522e-05	NA
YGR087C	130.502	-2.25094	0.208825	-10.7443	6.30532e-27	1.63034e-25	PDC6
YCR021C	230.684	-2.25395	0.351042	-6.42923	1.28255e-10	1.10701e-09	HSP30
YIL025C	13.363	-2.25503	0.455209	-4.47793	7.53709e-06	3.49089e-05	NA
YLR311C	22.1039	-2.27623	0.310582	-7.14953	8.70766e-13	8.97477e-12	NA
YLR154W-A	605.237	-2.39187	0.485225	-4.94818	7.49105e-07	4.0796e-06	NA
YHR022C	45.1348	-2.43207	0.31938	-7.53601	4.84581e-14	5.60662e-13	NA
YER053C-A	58.8085	-2.47422	0.334089	-7.31062	2.65909e-13	2.89097e-12	NA
YOR214C	16.7012	-2.66822	0.451402	-5.54849	2.88154e-08	1.92113e-07	SPR2
YPL214C	316.396	-2.72471	0.102271	-26.5965	7.45322e-156	6.16394e-153	THI6
YBR148W	628.383	-2.76454	0.149433	-18.3766	2.02317e-75	2.45547e-73	YSW1
YFR032C	192.688	-2.89384	0.178046	-16.0366	7.09882e-58	5.14837e-56	RRT5
YCR020C	411.021	-2.94662	0.140579	-20.9247	3.18857e-97	7.02311e-95	PET18
YOL055C	313.696	-2.95495	0.101701	-28.9807	1.15184e-184	1.71249e-181	THI20
YMR319C	927.67	-2.98365	0.115224	-25.8648	1.65983e-147	9.87103e-145	FET4
YFL013W-A	13.6492	-3.04403	0.40368	-7.03762	1.95546e-12	1.97438e-11	NA
YCL048W	27.6453	-3.25057	0.382247	-7.80393	6.00108e-15	7.64207e-14	SPS22
YLR004C	223.025	-3.52239	0.224403	-15.5879	8.79284e-55	5.8754e-53	THI73
YLR237W	1186.93	-3.52295	0.0852895	-41.2737	0	0	THI7
YBR092C	270.028	-4.01355	0.127006	-31.4005	1.98986e-216	3.94457e-213	PHO3
YGR144W	568.881	-6.93296	0.2082	-32.3261	3.0044e-229	8.93358e-226	THI4
YLR134W	7100.13	-7.34237	0.293408	-24.8983	7.76671e-137	3.84905e-134	PDC5
